6. Marquet S, Abel L, Hillaire D, et al. Genetic localization of a locus controlling the intensity of infection by *Schistosoma mansoni* on chromosome 5q31-q33. *Nature Genet* **1996**;14:181–4.
7. Roberts M, Butterworth AE, Kimani G, et al. Immunity after treatment of human schistosomiasis: association between cellular responses and resistance to reinfection. *Infect Immun* **1993**;61:4984–93.
8. Grogan JL, Kreamsner PG, Deelder AM, Yazdanbakhsh M. Elevated proliferation and interleukin-4 release from CD4<sup>+</sup> cells after chemotherapy in human *Schistosoma haematobium* infection. *Eur J Immunol* **1996**;26:1365–70.
9. Grogan JL, Kreamsner PG, van Dam GJ, Deelder AM, Yazdanbakhsh M. Anti-schistosome IgG4 and IgE at 2 years after chemotherapy: infected versus uninfected individuals. *J Infect Dis* **1997**;176:1344–50.
10. Colley DG, Barsoum IS, Dahawi HSS, et al. Immune responses and immunoregulation in relation to human schistosomiasis in Egypt. III. Immunity and longitudinal studies of in vitro responsiveness after treatment. *Trans R Soc Trop Med Hyg* **1986**;80:953–7.
11. De Jesus AM, Almeida RP, Bacellar O, et al. Correlation between cell-mediated immunity and degree of infection in subjects living in an endemic area of schistosomiasis. *Eur J Immunol* **1993**;23:152–8.
12. Zwingenberger K, Irschirk K, Sequeira G, et al. Release of IL-2 and IFN- $\gamma$  by peripheral blood mononuclear cells in human *S. mansoni* infections normalizes after chemotherapy. *Scand J Immunol* **1989**;30:463–71.

## The Importance of Leukotrienes in Mast Cell–Mediated *Toxoplasma gondii* Cytotoxicity

William R. Henderson, Jr., and Emil Y. Chi

Departments of Medicine and Pathology,  
University of Washington, Seattle

Mast cells participate in the host defense against parasites. Mast cells release leukotrienes (LTs), potent 5-lipoxygenase (LO) products of arachidonic acid well-known to be involved in the inflammatory process. After incubation with *Toxoplasma gondii*, mast cells were found to degranulate and release LTB<sub>4</sub>; this interaction damages the tachyzoites. This mast cell activity against the tachyzoites was inhibited by the 5-LO inhibitor A-63162 and the 5-LO-activating protein inhibitor MK-886 but not by the cyclooxygenase inhibitor indomethacin. Reactive oxygen species were not implicated in the mast cell–mediated toxoplasma-cidal activity. The generation of LTs is important for mast cell secretion, and LTB<sub>4</sub> released by mast cells and other inflammatory cells may be a key factor in the host defense against *T. gondii*.

*Toxoplasma gondii*, the protozoal pathogen that causes toxoplasmosis, inhibits respiratory burst activity and phagolysosomal fusion in macrophages replicating within these cells to the detriment of the host [1]. Effector cells against *T. gondii* include monocytes [2], interferon- $\gamma$  (IFN- $\gamma$ )–activated macrophages [1, 3], neutrophils [2], and platelets [4]. Mast cells exert cytotoxic activity against certain target cells, such as mammalian tumor cells [5] and schistosomula of *Schistosoma mansoni* [6], but their role in the host defense against *T. gondii* has not been examined previously. We investigated the role of mast cells against tachyzoites of *T. gondii*.

### Materials and Methods

**Special reagents.** The selective 5-lipoxygenase (LO) inhibitor A-63162 (*N*-hydroxy-*N*-[1-(4-phenylmethoxyphenyl)ethyl]aceta-

mid; provided by R. L. Bell and G. W. Carter, Abbott Laboratories, Abbott Park, IL) [7] and 5-lipoxygenase–activating protein (FLAP) inhibitor MK-886 (3-[1-(4-chlorobenzyl)3-*t*-butyl-thio-*t*-isopropyl-indol-2-yl]-2-2-dimethylpropanoic acid; provided by A. W. Ford-Hutchinson, Merck Frosst Centre for Therapeutic Research, Pointe Claire-Dorval, Québec, Canada) [8] were dissolved in DMSO at 10<sup>−2</sup> M concentrations and diluted in Tyrode's buffer with a final concentration of 0.1% dimethyl sulfoxide (DMSO). The CO inhibitor indomethacin (Sigma, St. Louis) was dissolved in ethanol at a concentration of 10<sup>−2</sup> M and diluted with PBS.

**Mast cell isolation.** Mast cells were obtained by peritoneal lavage of 200-g male Sprague-Dawley rats and purified (>90%) using 38% bovine serum albumin gradients [5]. The purified mast cells were >95% viable as determined by trypan blue dye exclusion [5].

**Macrophage isolation.** Resident peritoneal cells were collected by lavage of 6- to 8-week-old BALB/c mice [2] and resuspended in RPMI 1640 medium buffered with 10 mM HEPES (Whittaker MA Bioproducts, Walkersville, MD) and supplemented with 2 mM L-glutamine, 25 U/mL penicillin G, and 25  $\mu$ g/mL streptomycin (GIBCO BRL, Gaithersburg, MD). At a concentration of 1  $\times$  10<sup>6</sup> macrophages/mL, the cells were added to sterile 35  $\times$  10 mm tissue culture plates (Falcon 3801 Primaria; Becton Dickinson, Oxnard, CA) and allowed to adhere for 1 h at 37°C in 5% CO<sub>2</sub>–95% air with humidity. The plates were washed with sterile PBS to remove nonadherent cells, and adherent macrophages were used immediately in interactions with *T. gondii* with or without mast cell reaction mixtures as described below.

Received 20 June 1997; revised 21 November 1997.

Animal experimentation guidelines were followed.

Grant support: NIH (AI-17758, AI-34578, and AI-42989).

Reprints or correspondence: Dr. William R. Henderson, Jr., Room BB1333, Health Sciences, Dept. of Medicine, Box 356523, 1959 NE Pacific St., University of Washington, Seattle, WA 98195-6523.

The Journal of Infectious Diseases 1998;177:1437–43  
© 1998 by The University of Chicago. All rights reserved.  
0022-1899/98/7705-0048\$02.00

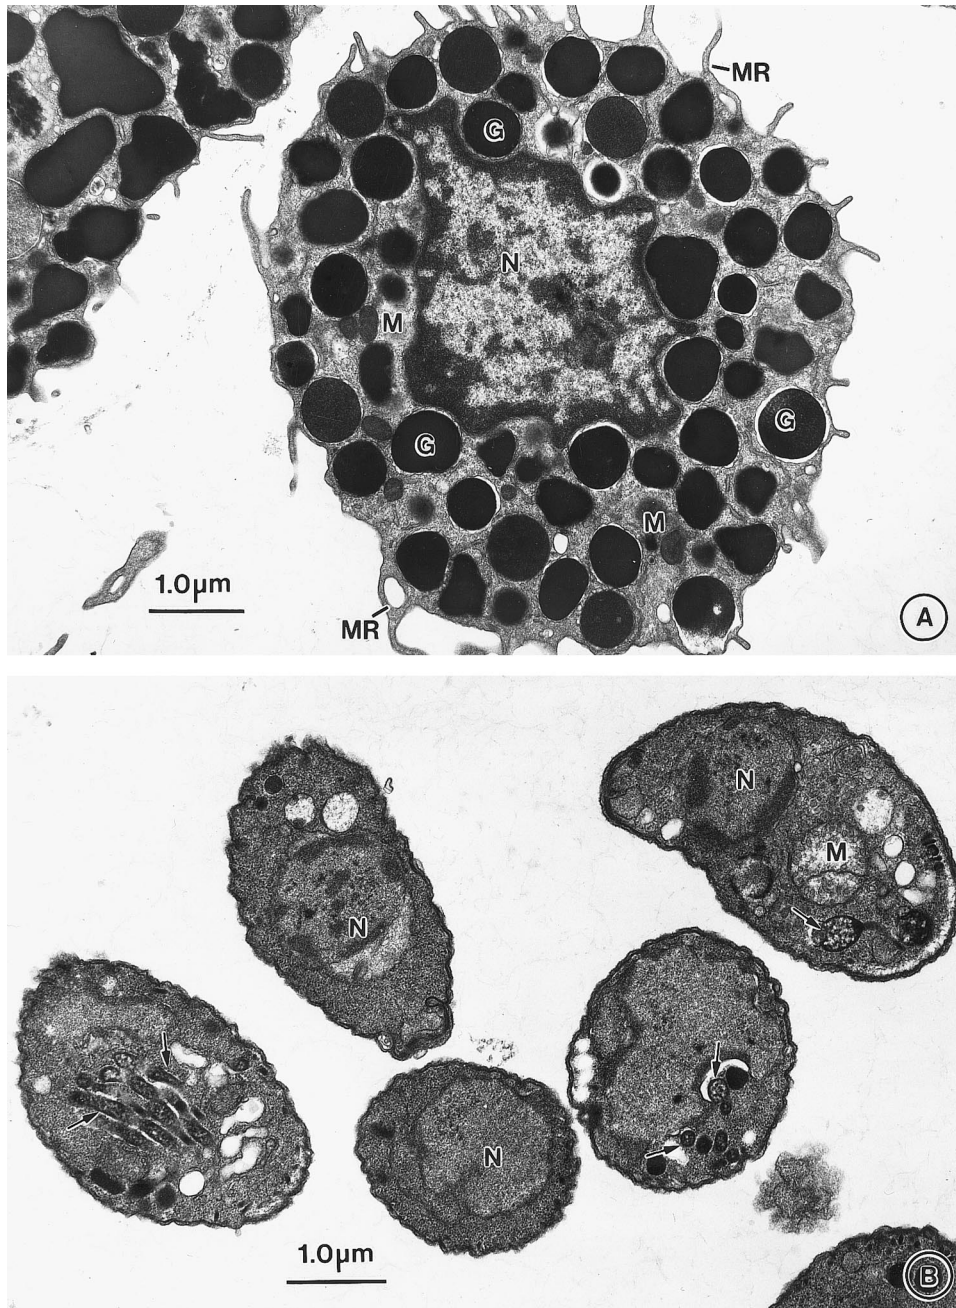

**Figure 1.** Morphology of mast cell-induced *T. gondii* cytotoxicity. **A, B:** Ultrastructure of mast cells and *T. gondii* tachyzoites as examined by transmission electron microscopy. **A:** Unstimulated rat peritoneal mast cells contain nucleus (N), electron-dense granules (G), mitochondria (M), and surface microridges (MR) of typical appearance. **B:** *T. gondii* tachyzoites contain nucleus (N), mitochondria (M), and characteristic rhoptry organelles (arrows).

***T. gondii* isolation.** *T. gondii* RH strain, maintained in BALB/c mice by intraperitoneal passage, was isolated by peritoneal lavage and filtration through a 3- $\mu$ m polycarbonate filter (Nuclepore, Pleasanton, CA) [4]. The *T. gondii* were >95% viable when assayed by trypan blue dye exclusion [4].

**Mast cell-*T. gondii* interaction.** Duplicate samples of mast cells and *T. gondii* (1:6 ratio; mast cell to organism) were incubated in Tyrode's buffer for 30–60 min at 37°C. The reaction mixtures were then centrifuged at 700 *g* for 10 min at 4°C. The supernatants and cell pellets were collected and stored at -70°C until assay of histamine or eicosanoids. For electron microscopy, cell pellets were fixed in 2% glutaraldehyde in 0.1 *M* sodium cacodylate

buffer, pH 7.4. To assess the role of eicosanoids and reactive oxygen species in mast cell-mediated cytotoxicity against *T. gondii*, in some studies the mast cell-*T. gondii* reaction mixtures were made in the presence of the 5-LO inhibitor A-63162, the FLAP inhibitor MK-886, the CO inhibitor indomethacin, or the hydrogen peroxide (H<sub>2</sub>O<sub>2</sub>) scavenger catalase.

To assess whether *T. gondii* after incubation with mast cells were able to infect and replicate in other cells, the macrophage monolayers were incubated for 30 min at 37°C with *T. gondii* that had been previously incubated in the absence or presence of mast cells (1:6 ratio; mast cell to organism) for 60 min at 37°C. Noningested organisms were then removed by washing, and the cell

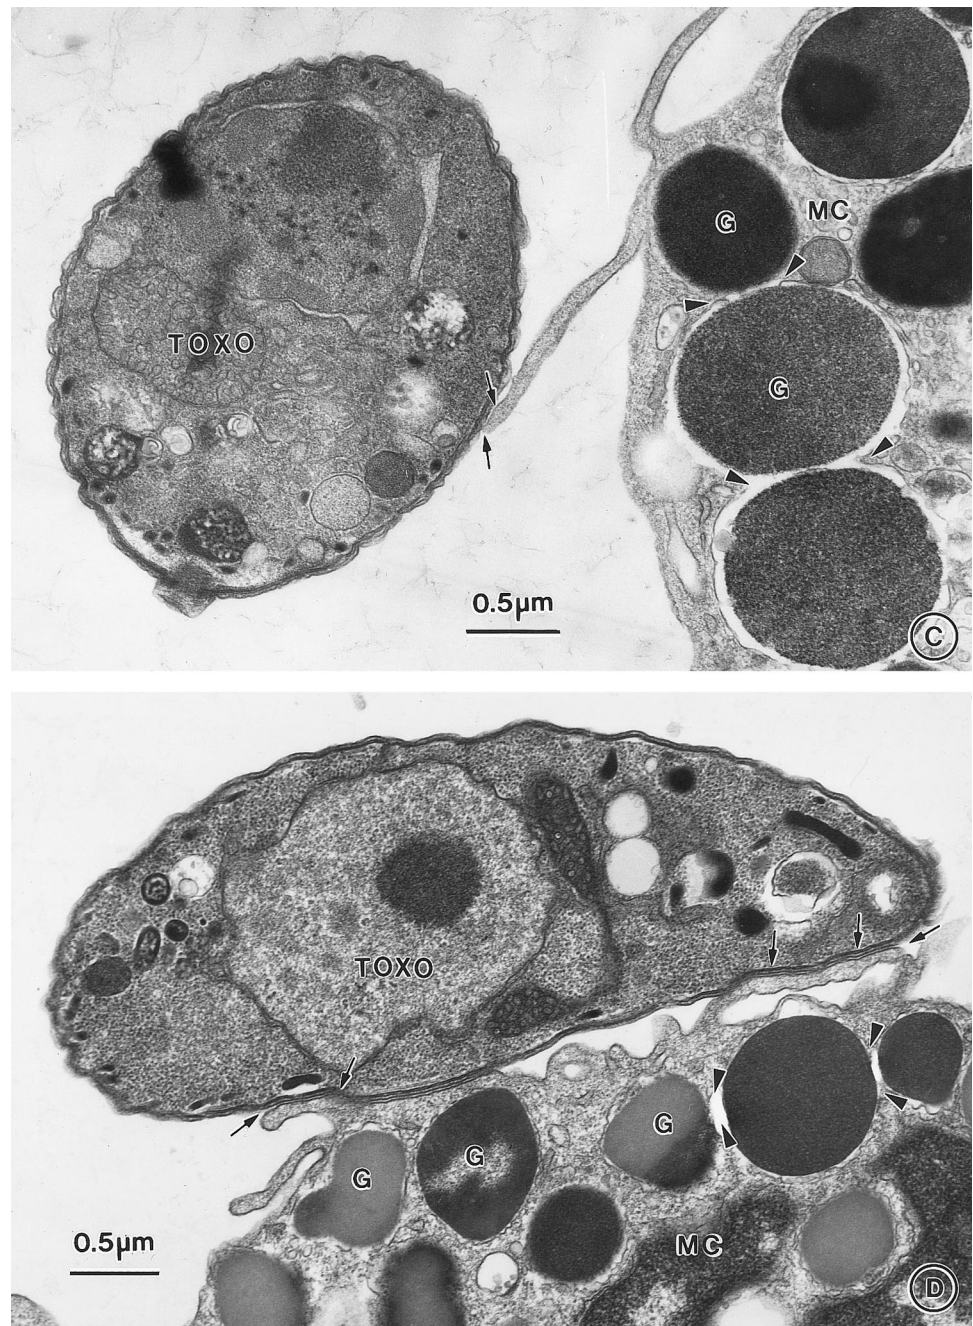

**Figure 1 (continued).** C, D: Adherence of *T. gondii* to mast cells. Mast cells (MC;  $2 \times 10^6$ ) were incubated with *T. gondii* ( $1.2 \times 10^7$ ; TOXO) in 1 mL of Tyrode's buffer, pH 7.4, for 30 min at 37°C. C: Initial contact (arrows) between mast cells and *T. gondii* tachyzoites is by extension of mast cell microvillus projection to surface of *T. gondii*. D: Extensive area of close apposition (arrows) of *T. gondii* and mast cell surface membrane structures is seen. In C and D, initial mast cell secretory changes noted after interaction with *T. gondii* include membrane fusion (arrowheads) between adjacent cytoplasmic granules (G).

monolayers were either fixed with 5% formalin (time 0) or incubated in RPMI medium for an additional 6 h before fixation in 5% formalin. After staining with Giemsa, the number of intracellular *T. gondii* per macrophage was determined by light microscopy [1].

**Histamine assay.** Histamine in the supernatant and cell pellet fractions was assayed fluorometrically between 360 and 480 nm with *o*-phthaldialdehyde [5].

**Eicosanoid assays.** The reaction mixture supernatants underwent reverse-phase high-pressure liquid chromatography on a 5-μm particle size analytical C<sub>18</sub> column (Ultrasphere; C<sub>18</sub>-IP, 4.6 × 250 mm; Beckman Instruments, Fullerton, CA) with methanol-

water-acetic acid (75:25:0.1) at a flow rate of 1 mL/min [1]. Eluting peaks were monitored at 235 and 270 nm, with rapid spectral scanning for identification of compounds that coeluted with authentic hydroxyeicosatetraenoic acid (HETE), hydroxyoctadecadienoic acid (HODE), and leukotriene (LT) standards [1]. In addition, the extracted supernatants were assayed for 5-LO (LTB<sub>4</sub>, LTC<sub>4</sub>) and CO (prostaglandin [PG] D<sub>2</sub>, PGE<sub>2</sub>, thromboxane [TX] B<sub>2</sub>) arachidonate products by RIA and ELISA [1, 9].

**Morphologic studies.** After glutaraldehyde fixation, the samples were processed for transmission electron microscopy and examined on an electron microscope (model 100B; JEOL, Tokyo)

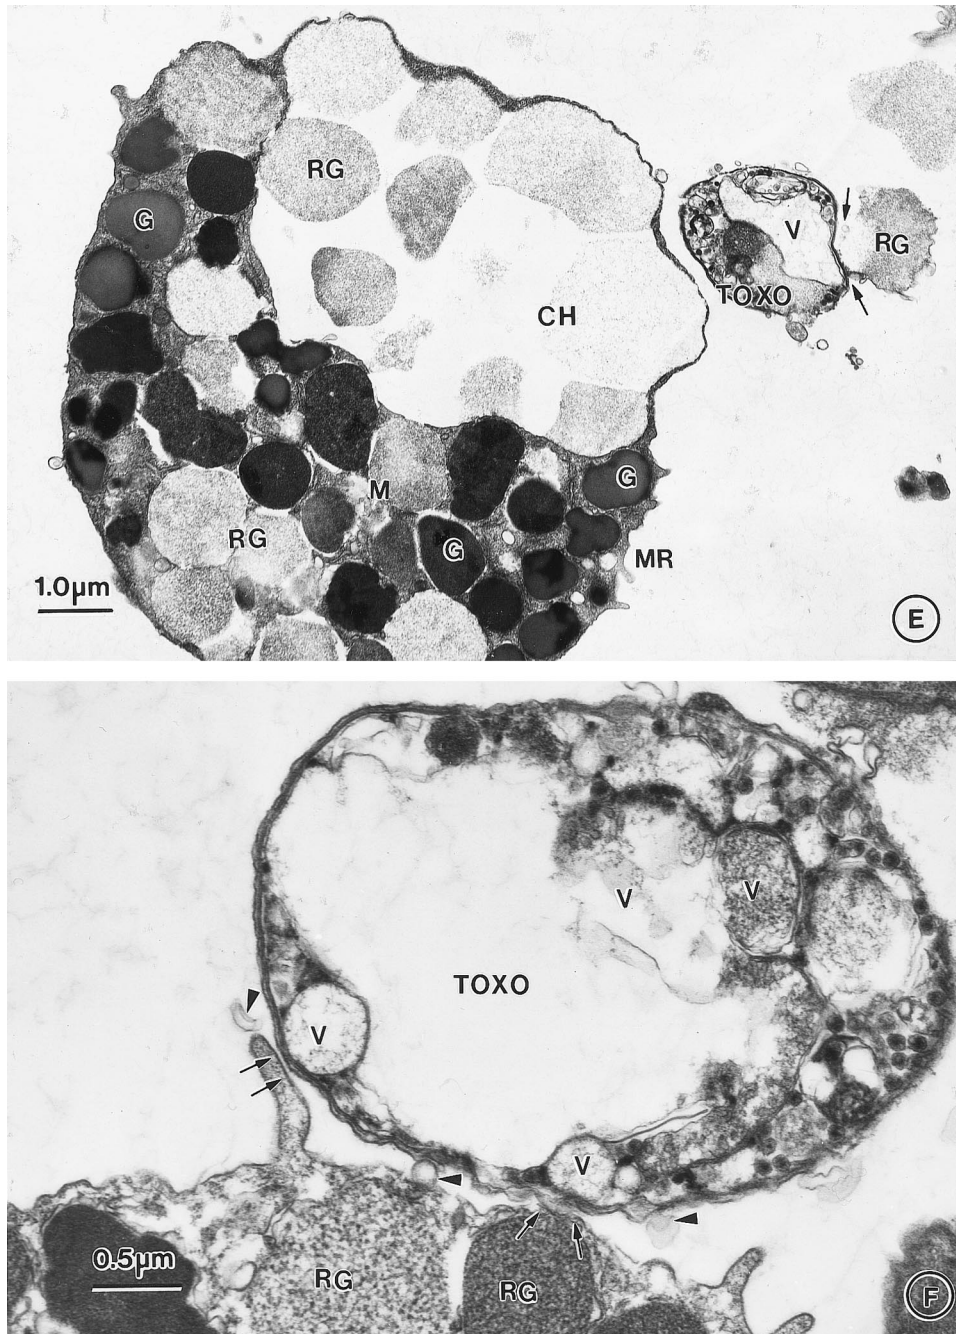

**Figure 1 (continued).** E, F: Mast cell–induced extracellular *T. gondii* cytotoxicity. E: Mast cells showed evidence of degranulation, with formation of secretory channels (CH) containing released granules (RG) of decreased electron density compared with intact cytoplasmic granules (G). Released mast cell granule material (arrows) is attached to parasite surface; vacuole (V) formation in *T. gondii* (TOXO) is observed. F: At higher magnification, close contact of mast cell surface membrane projections to *T. gondii* tachyzoite is seen (arrows). Cytotoxic changes noted in organisms after their interaction with mast cells include surface membrane vesiculation (arrowheads) and intracytoplasmic vacuolization (V) with loss of intracellular rhoptry organelles and mitochondria.

at 60 kV [1, 5]. Ten randomly selected fields in each grid were photographed at a magnification of 7000 for morphometric analysis of the percentage of degranulated mast cells [10] and damaged *T. gondii* [1, 11].

**Statistical analysis.** Data are reported as means  $\pm$  SEs of combined experiments. Differences were analyzed for significance ( $P < .05$ ) by Student's two-tailed *t* test for independent means.

## Results and Discussion

The interaction of mast cells and *T. gondii* tachyzoites was examined ultrastructurally and biochemically. Purified

rat peritoneal mast cells incubated in the absence of *T. gondii* exhibited their typical large electron-dense cytoplasmic granules by transmission electron microscopy (figure 1A). The crescent-shaped *T. gondii* incubated in buffer alone have a characteristic surface membrane structure composed of closely apposed inner and outer membrane units (figure 1B). When the two were incubated together in the absence of antibody or other agents, the tachyzoites adhered to the surface microvillus projections of the mast cells (figure 1C, D). This interaction was followed by mast cell degranulation (figure 1E–G). Large intracytoplasmic secretory channels

**Figure 1 (continued). G:** Mast cell–induced intracellular *T. gondii* cytotoxicity. Extensive mast cell degranulation is noted as consequence of interaction of mast cells (MC) with *T. gondii* (TOXO). Few electron-dense granules (\*) are observed, and swollen, released granules (RG) are present. Disrupted *T. gondii* are noted within intracellular secretory channels (CH) in mast cells. Extrusion of cytoplasmic contents between inner and outer surface membrane units (arrowheads) and surface membrane vesiculation (arrows) in tachyzoites are observed.

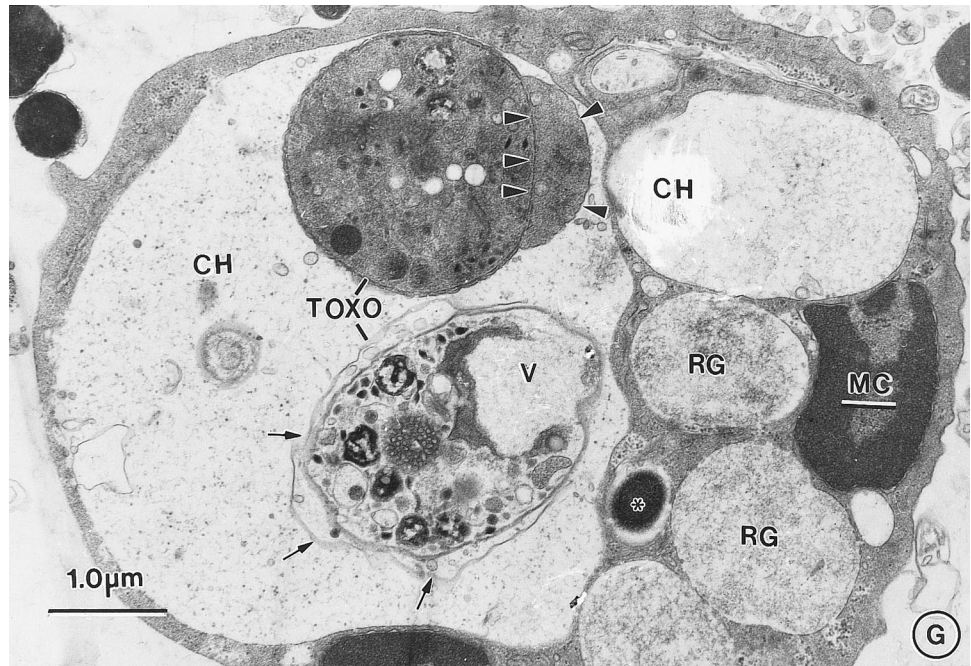

containing swollen mast cell granules of decreased electron density were observed.

Extracellularly released mast cell granule material attached to the surface of the parasites (figure 1E). Mast cell–induced *T. gondii* cytotoxic changes included a marked disruption of the surface membrane structures of the organisms; intracellular vacuolation and leakage of cytoplasmic contents into the space between the separate inner and outer membrane units occurred (figure 1E–G). Damaged parasites were also seen intracellularly within secretory channels of the degranulated mast cells (figure 1G). A possible mechanism of how *T. gondii* trigger mast cell degranulation may be through release of lysophospholipids from the tachyzoites' apical organelles, termed rophtries [12], since lysophospholipids potentiate mast cell histamine secretion [13].

Killing of *T. gondii* by mast cells was confirmed by the inability of the mast cell–treated tachyzoites to infect and replicate in murine peritoneal macrophages. *T. gondii* after incubation in the presence or absence of mast cells for 60 min at 37°C were incubated with macrophage monolayers for 30 min at 37°C. After washing, the incubations were either terminated by formalin fixation of the monolayers (0 h) or continued in media alone for an additional 6 h before fixation. In monolayers incubated with buffer-treated *T. gondii*, the number of *T. gondii* per macrophage was increased ~3-fold ( $4.9 \pm 0.4$  *T. gondii*/macrophage,  $P = .001$ ) at 6 h compared with 0 h ( $1.7 \pm 0.3$  *T. gondii*/macrophage). In contrast, there was no significant increase in the number of *T. gondii* present in the macrophages incubated with the mast cell–treated *T. gondii* at 6 h ( $0.6 \pm 0.2$  *T. gondii*/macrophage) compared with 0 h ( $0.4 \pm 0.1$  *T. gondii*/macrophage).

Mast cell histamine release increased from a background level of 9% to 72% after incubation with the tachyzoites. Exogenous histamine, however, had no effect on *T. gondii* ultrastructure. Only 3% of *T. gondii* tachyzoites ( $n = 106$ ) and 2% of *T. gondii* tachyzoites ( $n = 119$ ) had evidence of cytotoxic changes after incubation with, respectively, buffer alone or buffer containing  $10^{-6}$  M histamine for 30 min at 37°C.

5-LO arachidonate products were not detected in supernatants from mast cells (figure 2A) or *T. gondii* (figure 2B) tachyzoites incubated in buffer alone for 60 min. When mast cells were incubated with *T. gondii* (1:6 ratio, mast cell to organism), release of  $\text{LTB}_4$  was demonstrated by reverse-phase high-pressure liquid chromatography (figure 2C) and quantitated by RIA ( $219.8 \pm 82.2$  pg of  $\text{LTB}_4/5 \times 10^6$  mast cells,  $n = 5$ ). No significant release of  $\text{LTC}_4$ ,  $\text{LTD}_4$ ,  $\text{LTE}_4$ , 5-HETE, 12-HETE, 15-HETE, 9-HODE, 13-HODE,  $\text{PGD}_2$ ,  $\text{PGE}_2$ , or  $\text{TXB}_2$  above baseline (mast cells alone) was detected in the mast cell–*T. gondii* reaction mixture supernatants. The  $\text{LTB}_4$  levels ( $\sim 0.7 \times 10^{-9}$  M) found in the mast cell–*T. gondii* supernatants are comparable to those previously shown to induce *T. gondii* cytotoxicity ( $10^{-10}$ – $10^{-6}$  M).

$\text{LTB}_4$ -induced *T. gondii* cytotoxicity was characterized by vesiculation of the surface membrane and loss of the cytoplasmic contents of the organisms [1]. These are the same cytotoxic changes as seen in *T. gondii* after incubation with mast cells. The CO arachidonate acid product  $\text{TXA}_2$  [4] and the LO linoleic acid product 13-HODE released by human platelets [11] also induce similar cytotoxic changes after interaction with *T. gondii*, but neither of these products was found in the mast cell–*T. gondii* reaction mixture supernatants.

Both 5-LO and FLAP are necessary for LT synthesis [8]. The effect of the selective 5-LO inhibitor A-63162 [7] and the selective FLAP inhibitor MK-886 [8] on *T. gondii*-mediated mast cell degranulation was studied. By morphometric analysis, ~70% of the mast cells exhibited secretory changes ultrastructurally after interaction with *T. gondii* (table 1). A-63162 and MK-886 at  $10^{-6}$  M concentrations, which block LT release by >90% [8], each inhibited mast cell degranulation induced by *T. gondii* by 89% ( $P = .001$ ) and 83% ( $P = .001$ ), respectively. Histamine release by mast cells incubated with *T. gondii* in the presence of either A-63162 or MK-886 at a  $10^{-6}$  M concentration was not significantly different from that by mast cells incubated in buffer alone. Further, mast cell-mediated *T. gondii* cytotoxicity was also significantly inhibited by these LT inhibitors but not by the CO inhibitor indomethacin (table 1), indicating the importance of 5-LO arachi-

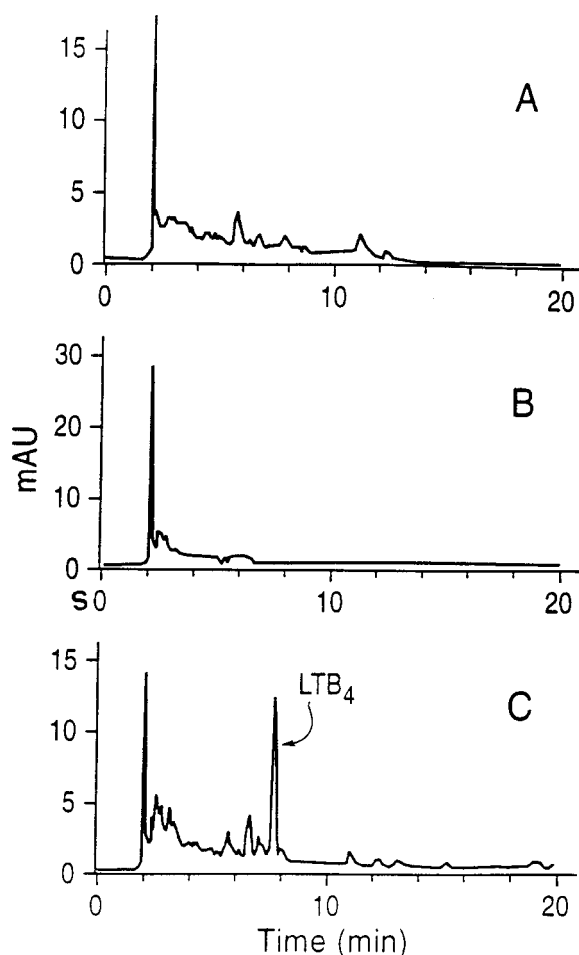

**Figure 2.** Role of leukotrienes in mast cell degranulation and *T. gondii* cytotoxicity: *T. gondii*-activated mast cells release LTB<sub>4</sub>. Mast cells ( $5 \times 10^6$ ) were incubated for 60 min at 37°C in absence (A) or presence (C) of *T. gondii* tachyzoites ( $3 \times 10^7$ ) in 1 mL of Tyrode's buffer. In B, *T. gondii* ( $3 \times 10^7$ ) were incubated in 1 mL of buffer alone for 60 min at 37°C. Supernatants underwent reverse-phase high-pressure liquid chromatography with UV absorbance measured at 270 nm.

**Table 1.** Leukotriene inhibitors block mast cell degranulation and *T. gondii* cytotoxicity.

| Reaction mixture                             | Mast cell degranulation, degranulated cells/total cells (%) | <i>T. gondii</i> cytotoxic changes, damaged <i>T. gondii</i> /total <i>T. gondii</i> (%) |
|----------------------------------------------|-------------------------------------------------------------|------------------------------------------------------------------------------------------|
| Mast cells                                   | 27/305 (8.9)                                                | —                                                                                        |
| <i>T. gondii</i>                             | —                                                           | 42/580 (7.2)                                                                             |
| Mast cells + <i>T. gondii</i>                | 278/398 (69.8)                                              | 134/306 (43.8)                                                                           |
| Mast cells + <i>T. gondii</i> + A-63162      | 71/341 (20.8)*                                              | 32/234 (13.4)*                                                                           |
| Mast cells + <i>T. gondii</i> + MK-886       | 44/206 (21.4)*                                              | 36/300 (12.0)*                                                                           |
| Mast cells + <i>T. gondii</i> + indomethacin | 252/399 (63.2)                                              | 144/389 (37.0)                                                                           |

NOTE. Mast cells ( $2 \times 10^6$ ) and *T. gondii* ( $1.2 \times 10^7$ ) were incubated in absence or presence of A-63162 ( $10^{-6}$  M), MK-886 ( $10^{-6}$  M), or indomethacin ( $10^{-5}$  M) in 1 mL of Tyrode's buffer for 30 min at 37°C. % of degranulated mast cells and damaged *T. gondii* was determined by morphometry. Data are means of 2–3 experiments for each condition.

\*  $P < .05$  vs. mast cells + *T. gondii*.

donate products in this cytotoxic process. Similarly, we recently found that LTs play an important role in human macrophage IFN- $\gamma$ -induced antitoxoplasma activity. LTB<sub>4</sub> promotes intracellular killing of *T. gondii* tachyzoites ingested by non-IFN- $\gamma$ -treated monocyte-derived macrophages [1]. In addition, the selective 5-LO inhibitor zileuton, but not the CO inhibitor indomethacin, inhibits IFN- $\gamma$ -induced antitoxoplasma activity in these phagocytes [1].

In prior work, we found that exogenous H<sub>2</sub>O<sub>2</sub> was required to produce mast cell degranulation [5] and cytotoxic activity against tumor cells [5] and schistosomula [6]; cytotoxicity occurred through the interaction of H<sub>2</sub>O<sub>2</sub> and a halide with endogenous mast cell granule peroxidase [5, 6]. We could not demonstrate a role of reactive oxygen species in mast cell toxoplasma activity. The addition of catalase (60  $\mu$ g/mL), which degrades H<sub>2</sub>O<sub>2</sub>, to the mast cell-*T. gondii* reaction mixtures, did not affect *T. gondii* cytotoxicity as assessed morphometrically (data not shown).

Our finding that mast cells produce toxic changes in *T. gondii* without exogenous H<sub>2</sub>O<sub>2</sub> or antibody demonstrates a new role for mast cells in the host defense against pathogens and suggests as well that LTB<sub>4</sub> could be an important cytotoxic mediator in this inflammatory process. Mast cell-derived chemoattractant LTs previously have been demonstrated to be key mediators of the early leukocyte influx into inflammatory sites induced by immune complexes [14, 15]. Further, inhibition of mast cell secretion by drugs that block 5-LO or FLAP may be an important antiinflammatory action of these agents in treatment of diseases such as asthma.

#### Acknowledgments

We thank Gertrude Chiang, Mechthild Jonas, and Dong Nguyen for skilled technical help and Rachel Norris for typing the manuscript.

## References

1. Yong EC, Chi EY, Henderson WR Jr. *Toxoplasma gondii* alters eicosanoid release by human mononuclear phagocytes: role of leukotrienes in interferon  $\gamma$ -induced antitoxoplasma activity. *J Exp Med* **1994**;180:1637–48.
2. Wilson CB, Remington JS. Activity of human blood leukocytes against *Toxoplasma gondii*. *J Infect Dis* **1979**;140:890–5.
3. Suzuki Y, Orellana MA, Schreiber RD, Remington JS. Interferon- $\gamma$ : the major mediator of resistance against *Toxoplasma gondii*. *Science* **1988**;240:516–8.
4. Yong EC, Chi EY, Fritsche TR, Henderson WR Jr. Human platelet-mediated cytotoxicity against *Toxoplasma gondii*: role of thromboxane. *J Exp Med* **1991**;173:65–78.
5. Henderson WR, Chi EY, Jong EC, Klebanoff SJ. Mast-cell mediated tumor-cell cytotoxicity. Role of the peroxidase system. *J Exp Med* **1981**;153:520–33.
6. Henderson WR, Chi EY, Jong EC, Klebanoff SJ. Mast cell-mediated toxicity to schistosomula of *Schistosoma mansoni*: potentiation by exogenous peroxidase. *J Immunol* **1986**;137:2695–9.
7. Summers JB, Gunn BP, Martin JG, et al. Orally active hydroxamic acid inhibitors of leukotriene biosynthesis. *J Med Chem* **1988**;31:3–5.
8. Dixon RAF, Diehl RE, Opas E, et al. Requirement of a 5-lipoxygenase-activating protein for leukotriene synthesis. *Nature* **1990**;343:282–4.
9. McBride DE, Koenig JQ, Lucht DL, Williams PV, Henderson WR Jr. Inflammatory effects of ozone in the upper airways of subjects with asthma. *Am J Respir Crit Care Med* **1994**;149:1192–7.
10. Su M, Chi EY, Bishop MJ, Henderson WR Jr. Lung mast cells increase in number and degranulate during pulmonary artery occlusion/reperfusion injury in dogs. *Am Rev Respir Dis* **1993**;147:448–56.
11. Henderson WR Jr, Chi EY. Cytotoxic activity of 13-hydroxyoctadecadienoic acid against *Toxoplasma gondii*. *Parasitology* **1992**;105:343–7.
12. Foussard F, Leriche MA, Dubremetz JF. Characterization of the lipid content of *Toxoplasma gondii* rhoptries. *Parasitology* **1991**;102:367–70.
13. Martin TW, Lagunoff D. Interactions of lysophospholipids and mast cells. *Nature* **1979**;279:250–2.
14. Chen XS, Sheller JR, Johnson EN, Funk CD. Role of leukotrienes revealed by targeted disruption of the 5-lipoxygenase gene. *Nature* **1994**;372:179–82.
15. Ramos BF, Qureshi R, Olsen KM, Jakschik BA. The importance of mast cells for the neutrophil influx in immune complex-induced peritonitis in mice. *J Immunol* **1990**;145:1868–73.

## Direct Isolation of DNA from Patient Stools for Polymerase Chain Reaction Detection of *Cryptosporidium parvum*

Guan Zhu, Mary J. Marchewka, Jill G. Ennis, and Janet S. Keithly

Wadsworth Center, New York State Department of Health, Albany, New York

Although polymerase chain reaction (PCR) can sensitively detect parasitic or other infections, its use with fecal samples is extremely limited, primarily because of the presence of substances that inhibit DNA extension. Here an improved protocol is reported for directly isolating DNA from aged or fresh formalin-fixed stools, which can then be used to detect *Cryptosporidium parvum* by nested PCR. This method is highly reproducible, sensitive, and specific. It detects <1 pg of *C. parvum* DNA in human stool, and there are no cross-reactions with other parasites commonly found there.

The polymerase chain reaction (PCR) amplification of a unique DNA segment belonging to an organism can be used for its specific detection in clinical samples. Because of increased sensitivity and specificity, PCR (or PCR-related technologies) has been used to improve the detection of *Cryptosporidium parvum* in clinical and environmental samples. In order to provide a method for the molecular diagnosis of *C. parvum* from patient stools, we began a study to evaluate published PCR techniques for detection of this opportunistic pathogen in clinical samples [1–4]. Previously described methods for molecular detection of *C. parvum*

usually relied upon DNA extraction from purified oocysts [1–4], and some even required 100 ng of DNA for a nested PCR (~1 million oocysts [5]). In addition, most suffered from the major problem encountered when isolating DNA from bacteria, viruses, and other parasites in stool [6–9], that is, inhibitors copurified with DNA preventing reliable detection by PCR. None of these proved sufficiently reliable, sensitive, or specific for PCR detection of *C. parvum* in stool.

In this study, a highly reliable DNA extraction method was combined with nested PCR that enables femtogram quantities of *C. parvum* DNA to be detected in aged or fresh formalin-fixed human stools. Using the small subunit rRNA (srDNA) as the target sequence, the nested reaction is *C. parvum*-specific, that is, no cross-reactions were observed when purified genomic DNA (gDNA) of other parasites, or DNA extracted from human stools containing enteric microorganisms, were tested. Unlike previously published techniques, this PCR method is highly reproducible, specific, and sensitive and does not require prior isolation, concentration, or purification of oocysts for detecting *C. parvum* in human stool.

Received 19 June 1997; revised 21 November 1997.

Financial support: New York State Department of Health; Health Research, Inc., The Wadsworth Center (G.Z.).

Reprints or correspondence: Dr. Janet S. Keithly, The Wadsworth Center, New York State Dept. of Health, Division of Infectious Diseases, David Axelrod Institute for Public Health, Room 3112, 120 New Scotland Ave., Albany, NY 12208.
